# Supplementary material
Source: publisher figshare collection journal article supplement (https://acs.figshare.com/ndownloader/files/4119235)
Supplement: Supplementary file 1 [file 4119235]

data_publication_text
_publ_requested_journal          'J. Org. Chem.'
_publ_contact_author_name        'Adam J. Matzger'
_publ_contact_author_address     
;Department of Chemistry and the Macromolecular Science and Engineering Program
University of Michigan 
930 North University Avenue
Ann Arbor, MI 48109-1055
;
_publ_contact_author_email       matzger@umich.edu
_publ_contact_author_phone       734.615.6627
loop_
_publ_author_name
_publ_author_address
'Henssler, John T.'
;Department of Chemistry and the Macromolecular Science and Engineering Program
University of Michigan 
930 North University Avenue
Ann Arbor, MI 48109-1055
;
'Matzger, Adam J.'
;Department of Chemistry and the Macromolecular Science and Engineering Program
University of Michigan 
930 North University Avenue
Ann Arbor, MI 48109-1055
;

 
data_FT-TF
 
_audit_creation_method            SHELXL-97 
_chemical_name_systematic 
; 
5,5'-bithieno[3,2-b]furan 
; 
_chemical_name_common             'FT-TF' 
_chemical_melting_point           ? 
_chemical_formula_moiety          'C12 H6 O2 S2' 
_chemical_formula_sum 
 'C12 H6 O2 S2' 
_chemical_formula_weight          246.29 
 
loop_ 
 _atom_type_symbol 
 _atom_type_description 
 _atom_type_scat_dispersion_real 
 _atom_type_scat_dispersion_imag 
 _atom_type_scat_source 
 'C'  'C'   0.0181   0.0091 
 'International Tables Vol C Tables 4.2.6.8 and 6.1.1.4' 
 'H'  'H'   0.0000   0.0000 
 'International Tables Vol C Tables 4.2.6.8 and 6.1.1.4' 
 'S'  'S'   0.3331   0.5567 
 'International Tables Vol C Tables 4.2.6.8 and 6.1.1.4' 
 'O'  'O'   0.0492   0.0322 
 'International Tables Vol C Tables 4.2.6.8 and 6.1.1.4' 
 
_symmetry_cell_setting                 monoclinic
_symmetry_space_group_name_H-M        'P 21/a '
_symmetry_space_group_name_Hall       '-P 2yab'
_symmetry_Int_Tables_number            14
 
loop_ 
 _symmetry_equiv_pos_as_xyz 
 'x, y, z' 
 '-x+1/2, y+1/2, -z' 
 '-x, -y, -z' 
 'x-1/2, -y-1/2, z' 
 
_cell_length_a                    10.68236(19) 
_cell_length_b                    3.83987(7) 
_cell_length_c                    12.9514(2) 
_cell_angle_alpha                 90.00 
_cell_angle_beta                  111.1590(10) 
_cell_angle_gamma                 90.00 
_cell_volume                      495.436(16) 
_cell_formula_units_Z             2 
_cell_measurement_temperature     95(2) 
_cell_measurement_reflns_used     3834
_cell_measurement_theta_min       6.7
_cell_measurement_theta_max       66.6 
 
_exptl_crystal_description        'block' 
_exptl_crystal_colour             'yellow' 
_exptl_crystal_size_max           0.23 
_exptl_crystal_size_mid           0.15 
_exptl_crystal_size_min           0.08 
_exptl_crystal_density_meas       ? 
_exptl_crystal_density_diffrn     1.651 
_exptl_crystal_density_method     'not measured' 
_exptl_crystal_F_000              252 
_exptl_absorpt_coefficient_mu     4.695 
_exptl_absorpt_correction_type    multi-scan
_exptl_absorpt_correction_T_min   0.4114 
_exptl_absorpt_correction_T_max   0.7051 
_exptl_absorpt_process_details    
;
    Higashi, T. (1995). Program for Absorption Correction.
    Rigaku Corporation, Tokyo, Japan.
; 
 
_exptl_special_details 
;
    Higashi, T. (1995). Program for Absorption Correction.
    Rigaku Corporation, Tokyo, Japan.
;
 
_diffrn_ambient_temperature       95(2) 
_diffrn_radiation_wavelength      1.54187 
_diffrn_radiation_type            CuK\a 
_diffrn_radiation_source          'fine-focus sealed tube' 
_diffrn_radiation_monochromator   graphite 
_diffrn_measurement_device_type   'Rigaku R-Axis Spider' 
_diffrn_measurement_method         \w 
_diffrn_detector_area_resol_mean  10.00 
_diffrn_standards_number          ? 
_diffrn_standards_interval_count  ? 
_diffrn_standards_interval_time   ? 
_diffrn_standards_decay_%         ? 
_diffrn_reflns_number             3714 
_diffrn_reflns_av_R_equivalents   0.0288 
_diffrn_reflns_av_sigmaI/netI     0.0218 
_diffrn_reflns_limit_h_min        -12 
_diffrn_reflns_limit_h_max        12 
_diffrn_reflns_limit_k_min        -4 
_diffrn_reflns_limit_k_max        4 
_diffrn_reflns_limit_l_min        -15 
_diffrn_reflns_limit_l_max        15 
_diffrn_reflns_theta_min          7.33 
_diffrn_reflns_theta_max          66.57 
_reflns_number_total              867 
_reflns_number_gt                 839 
_reflns_threshold_expression      >2sigma(I) 
 
_computing_data_collection        'PROCESS-AUTO' 
_computing_cell_refinement        'PROCESS-AUTO' 
_computing_data_reduction         'CrystalStructure'
_computing_structure_solution     'SIR2004' 
_computing_structure_refinement   'SHELXL-97 (Sheldrick, 1997)' 
_computing_molecular_graphics     ? 
_computing_publication_material    'CrystalStructure 3.8'
 
_refine_special_details 
; 
 Refinement of F^2^ against ALL reflections.  The weighted R-factor wR and 
 goodness of fit S are based on F^2^, conventional R-factors R are based 
 on F, with F set to zero for negative F^2^. The threshold expression of 
 F^2^ > 2sigma(F^2^) is used only for calculating R-factors(gt) etc. and is 
 not relevant to the choice of reflections for refinement.  R-factors based 
 on F^2^ are statistically about twice as large as those based on F, and R- 
 factors based on ALL data will be even larger. 
; 
 
_refine_ls_structure_factor_coef  Fsqd  
_refine_ls_matrix_type            full 
_refine_ls_weighting_scheme       calc  
_refine_ls_weighting_details 
 'calc w=1/[\s^2^(Fo^2^)+(0.0509P)^2^+0.5333P] where P=(Fo^2^+2Fc^2^)/3' 
_atom_sites_solution_primary      direct 
_atom_sites_solution_secondary    difmap 
_atom_sites_solution_hydrogens    geom 
_refine_ls_hydrogen_treatment     riding
_refine_ls_extinction_method      none 
_refine_ls_extinction_coef        ? 
_refine_ls_number_reflns          867 
_refine_ls_number_parameters      74 
_refine_ls_number_restraints      0 
_refine_ls_R_factor_all           0.0317 
_refine_ls_R_factor_gt            0.0311 
_refine_ls_wR_factor_ref          0.0873 
_refine_ls_wR_factor_gt           0.0868 
_refine_ls_goodness_of_fit_ref    1.066 
_refine_ls_restrained_S_all       1.066 
_refine_ls_shift/su_max           0.001 
_refine_ls_shift/su_mean          0.000 
 
loop_ 
 _atom_site_label 
 _atom_site_type_symbol 
 _atom_site_fract_x 
 _atom_site_fract_y 
 _atom_site_fract_z 
 _atom_site_U_iso_or_equiv 
 _atom_site_adp_type 
 _atom_site_occupancy 
 _atom_site_symmetry_multiplicity 
 _atom_site_calc_flag 
 _atom_site_refinement_flags 
 _atom_site_disorder_assembly 
 _atom_site_disorder_group 
S1 S 0.61354(4) 0.79100(13) 0.40212(4) 0.0130(2) Uani 1 1 d . . . 
O1 O 0.32041(13) 1.0455(4) 0.14400(11) 0.0176(4) Uani 1 1 d . . . 
C1 C 0.3967(2) 0.9099(6) 0.08667(16) 0.0183(5) Uani 1 1 d . . . 
H1 H 0.3681 0.9054 0.0082 0.022 Uiso 1 1 calc R . . 
C2 C 0.5161(2) 0.7850(5) 0.15472(17) 0.0161(5) Uani 1 1 d . . . 
H2 H 0.5843 0.6794 0.1344 0.019 Uiso 1 1 calc R . . 
C3 C 0.51750(19) 0.8465(5) 0.26422(16) 0.0137(4) Uani 1 1 d . . . 
C4 C 0.39843(19) 1.0039(5) 0.25350(16) 0.0141(4) Uani 1 1 d . . . 
C5 C 0.37792(19) 1.0852(5) 0.35224(16) 0.0137(4) Uani 1 1 d . . . 
H3 H 0.3002 1.1944 0.3566 0.016 Uiso 1 1 calc R . . 
C6 C 0.48824(19) 0.9817(5) 0.44149(15) 0.0123(4) Uani 1 1 d . . . 
 
loop_ 
 _atom_site_aniso_label 
 _atom_site_aniso_U_11 
 _atom_site_aniso_U_22 
 _atom_site_aniso_U_33 
 _atom_site_aniso_U_23 
 _atom_site_aniso_U_13 
 _atom_site_aniso_U_12 
S1 0.0116(3) 0.0152(3) 0.0124(3) -0.00030(17) 0.0046(2) 0.00146(17) 
O1 0.0145(7) 0.0256(9) 0.0116(7) 0.0018(6) 0.0033(5) 0.0001(6) 
C1 0.0203(10) 0.0233(12) 0.0130(10) -0.0024(9) 0.0082(8) -0.0048(9) 
C2 0.0179(10) 0.0166(11) 0.0160(10) -0.0021(8) 0.0087(9) -0.0017(8) 
C3 0.0143(9) 0.0145(10) 0.0128(9) -0.0005(8) 0.0056(8) -0.0042(8) 
C4 0.0125(9) 0.0154(11) 0.0136(9) 0.0014(8) 0.0036(7) -0.0022(8) 
C5 0.0118(9) 0.0148(11) 0.0157(9) 0.0003(8) 0.0065(8) -0.0014(8) 
C6 0.0133(9) 0.0098(10) 0.0157(10) -0.0006(7) 0.0076(7) -0.0022(7) 
 
_geom_special_details 
; 
 All esds (except the esd in the dihedral angle between two l.s. planes) 
 are estimated using the full covariance matrix.  The cell esds are taken 
 into account individually in the estimation of esds in distances, angles 
 and torsion angles; correlations between esds in cell parameters are only 
 used when they are defined by crystal symmetry.  An approximate (isotropic) 
 treatment of cell esds is used for estimating esds involving l.s. planes. 
; 
 
loop_ 
 _geom_bond_atom_site_label_1 
 _geom_bond_atom_site_label_2 
 _geom_bond_distance 
 _geom_bond_site_symmetry_2 
 _geom_bond_publ_flag 
S1 C3 1.722(2) . ? 
S1 C6 1.7551(19) . ? 
O1 C4 1.370(2) . ? 
O1 C1 1.387(2) . ? 
C1 C2 1.350(3) . ? 
C1 H1 0.9500 . ? 
C2 C3 1.432(3) . ? 
C2 H2 0.9500 . ? 
C3 C4 1.369(3) . ? 
C4 C5 1.408(3) . ? 
C5 C6 1.378(3) . ? 
C5 H3 0.9500 . ? 
C6 C6 1.451(4) 3_676 ? 
 
loop_ 
 _geom_angle_atom_site_label_1 
 _geom_angle_atom_site_label_2 
 _geom_angle_atom_site_label_3 
 _geom_angle 
 _geom_angle_site_symmetry_1 
 _geom_angle_site_symmetry_3 
 _geom_angle_publ_flag 
C3 S1 C6 91.05(9) . . ? 
C4 O1 C1 104.76(15) . . ? 
C2 C1 O1 112.54(17) . . ? 
C2 C1 H1 123.7 . . ? 
O1 C1 H1 123.7 . . ? 
C1 C2 C3 104.93(18) . . ? 
C1 C2 H2 127.5 . . ? 
C3 C2 H2 127.5 . . ? 
C4 C3 C2 107.15(18) . . ? 
C4 C3 S1 110.10(15) . . ? 
C2 C3 S1 142.75(16) . . ? 
C3 C4 O1 110.62(17) . . ? 
C3 C4 C5 116.68(18) . . ? 
O1 C4 C5 132.68(17) . . ? 
C6 C5 C4 109.36(17) . . ? 
C6 C5 H3 125.3 . . ? 
C4 C5 H3 125.3 . . ? 
C5 C6 C6 128.4(2) . 3_676 ? 
C5 C6 S1 112.80(14) . . ? 
C6 C6 S1 118.77(19) 3_676 . ? 
 
loop_ 
 _geom_torsion_atom_site_label_1 
 _geom_torsion_atom_site_label_2 
 _geom_torsion_atom_site_label_3 
 _geom_torsion_atom_site_label_4 
 _geom_torsion 
 _geom_torsion_site_symmetry_1 
 _geom_torsion_site_symmetry_2 
 _geom_torsion_site_symmetry_3 
 _geom_torsion_site_symmetry_4 
 _geom_torsion_publ_flag 
C4 O1 C1 C2 0.6(2) . . . . ? 
O1 C1 C2 C3 -0.4(2) . . . . ? 
C1 C2 C3 C4 0.0(2) . . . . ? 
C1 C2 C3 S1 179.4(2) . . . . ? 
C6 S1 C3 C4 0.34(16) . . . . ? 
C6 S1 C3 C2 -179.0(3) . . . . ? 
C2 C3 C4 O1 0.3(2) . . . . ? 
S1 C3 C4 O1 -179.26(13) . . . . ? 
C2 C3 C4 C5 179.37(18) . . . . ? 
S1 C3 C4 C5 -0.2(2) . . . . ? 
C1 O1 C4 C3 -0.6(2) . . . . ? 
C1 O1 C4 C5 -179.4(2) . . . . ? 
C3 C4 C5 C6 -0.1(3) . . . . ? 
O1 C4 C5 C6 178.7(2) . . . . ? 
C4 C5 C6 C6 179.0(2) . . . 3_676 ? 
C4 C5 C6 S1 0.3(2) . . . . ? 
C3 S1 C6 C5 -0.39(16) . . . . ? 
C3 S1 C6 C6 -179.2(2) . . . 3_676 ? 
 
_diffrn_measured_fraction_theta_max    0.983 
_diffrn_reflns_theta_full              66.57 
_diffrn_measured_fraction_theta_full   0.983 
_refine_diff_density_max    0.329 
_refine_diff_density_min   -0.259 
_refine_diff_density_rms    0.068 
